# Supplementary material for: Characterization of Tumor-Associated Macrophages and the Immune Microenvironment in Limited-Stage Neuroendocrine-High and -Low Small Cell Lung Cancer
Source: MDPI journal article supplement (doi:10.3390/biology10060502), 2021-06-04
Supplement: s1 [file s1]

## SUPPLEMENTARY MATERIAL

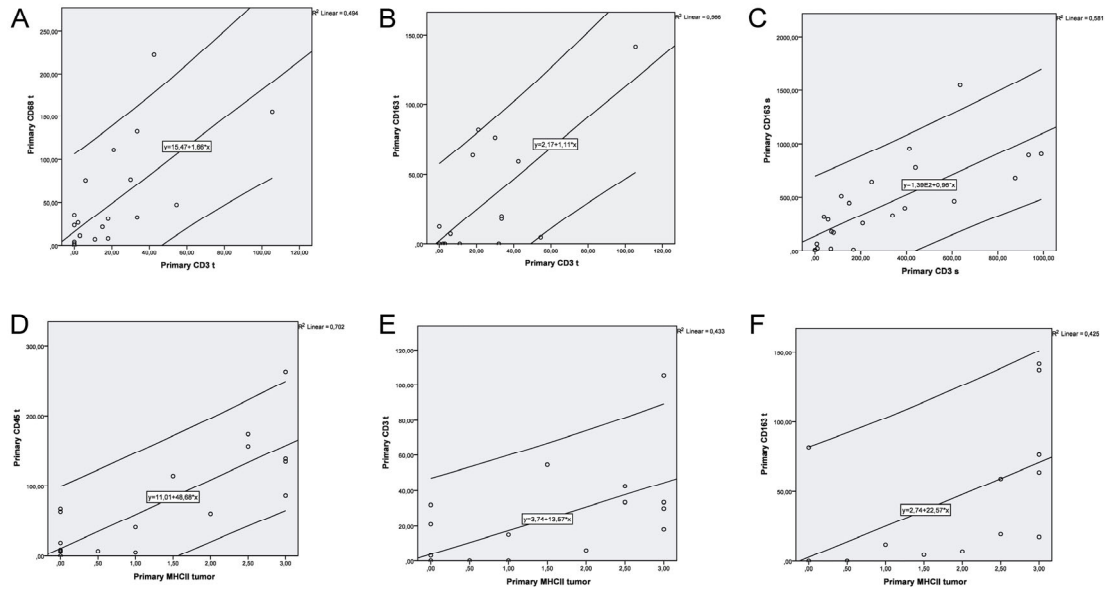

**Figure S1. Regression analysis of macrophage (CD68, CD163, CD33), MHCII, immune cell (CD45), and lymphocyte (CD3) marker tissue expression in SCLC tumor samples.**

The expression of CD68 and CD163 showed a very strong and strong positive correlation with CD3 expression in tumor nests ( $r=0.807$ ,  $p<0.001$ ; A and  $r=0.707$ ,  $p<0.001$ ; B), respectively. The cellular density of CD163+ cells showed very strong positive correlation with CD3+ T-lymphocyte density in the stroma compartment ( $r=0.864$ ,  $p<0.001$ ; C).

The cellular density of CD45+ immune cells and CD3+ T-lymphocytes in tumor nests showed a strong positive correlation with MHCII expression on tumor cells ( $r=0.753$ ,  $p<0.001$ , D and  $r=0.705$ ,  $p=0.001$ , E). Cellular density of CD163+ macrophages in tumor nests showed very strong positive correlation with MHCII expression on tumor cells ( $r=0.801$ ,  $p<0.001$ , F).

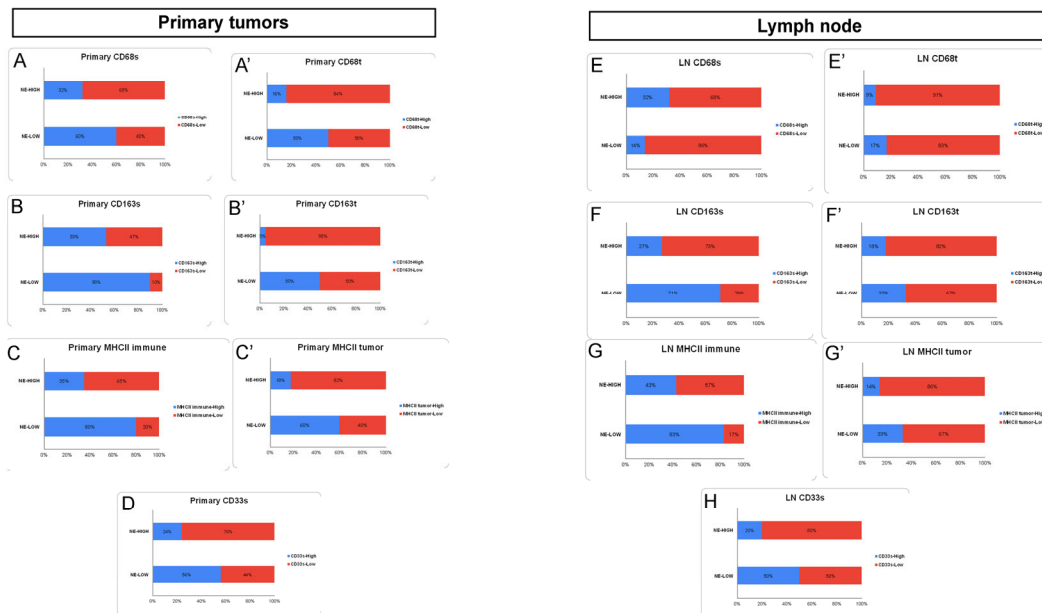

**Figure S2. Distribution of CD68-, CD163-, CD33-, and MHCII HIGH- and LOW primary tumors and LN metastases according to NE phenotype.**



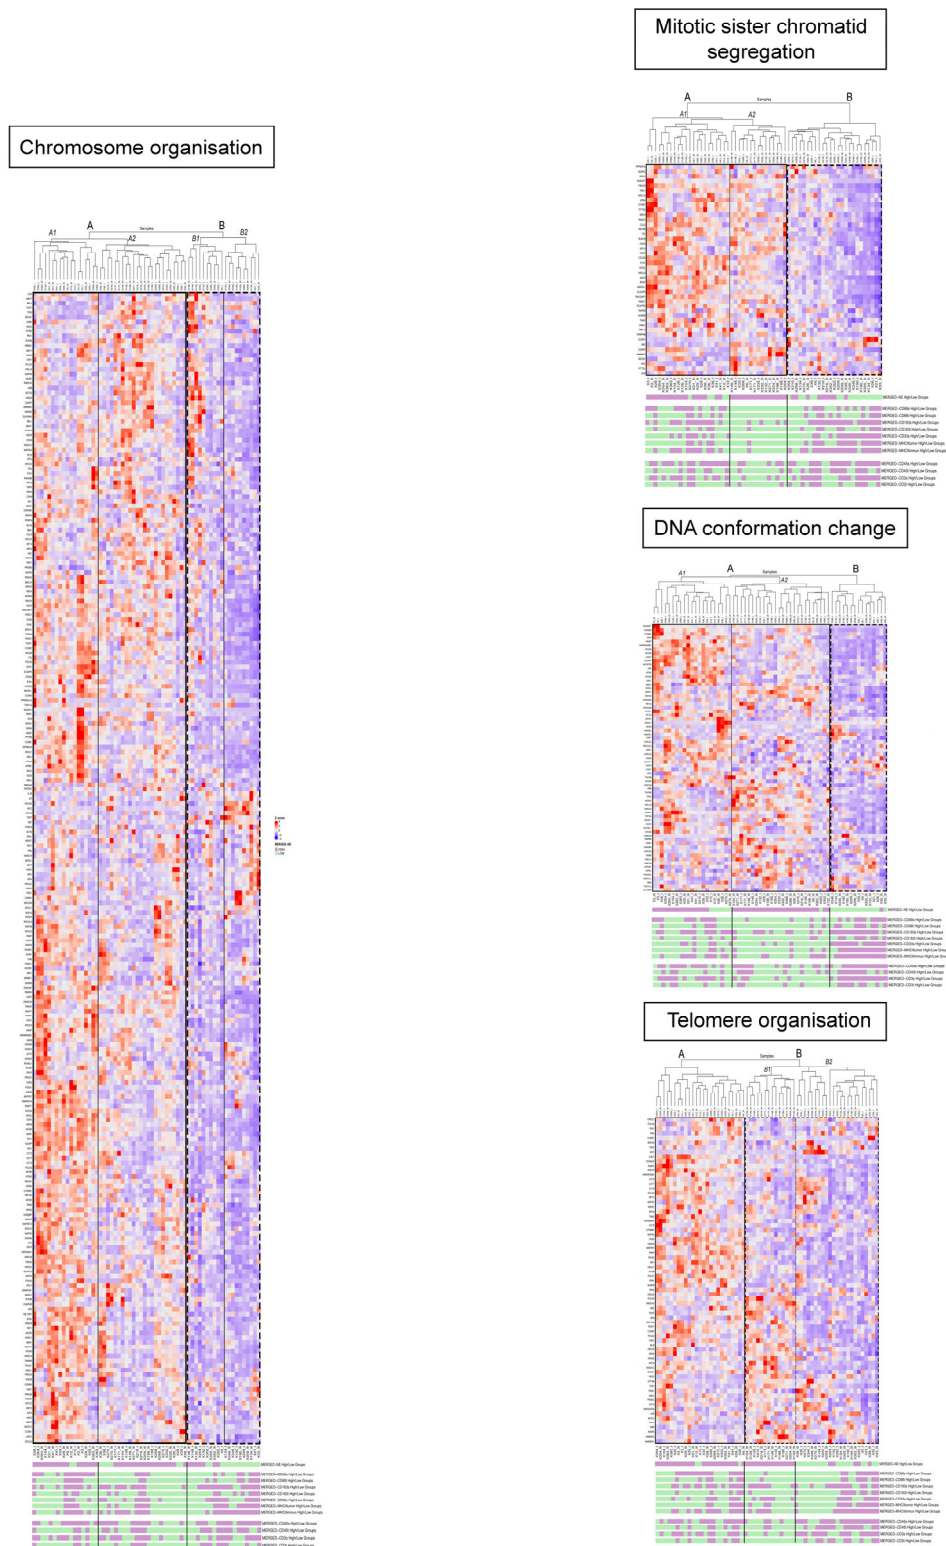

**Figure S4. Gene expression data of additional oncogenic pathways**

Heatmaps show gene expression profile of GO pathways, *chromosome organization*, *mitotic sister chromatid segregation*, *DNA conformation change*, and *telomere organization* at the level of individual tumor samples (primary and LN merged). The first two clusters (A1 and A2, A and B1 in *telomere organization*) represent mainly NE-high tumors with low or variable levels of macrophage- and T-cell infiltration. These tumors show strong overall expression in most genes of

their corresponding pathway. The third cluster (B, B2 in telomere organization) comprises NE-low phenotype tumors in all of the oncogenic pathways, where it is associated with macrophage-high and lymphocyte-high tumors.

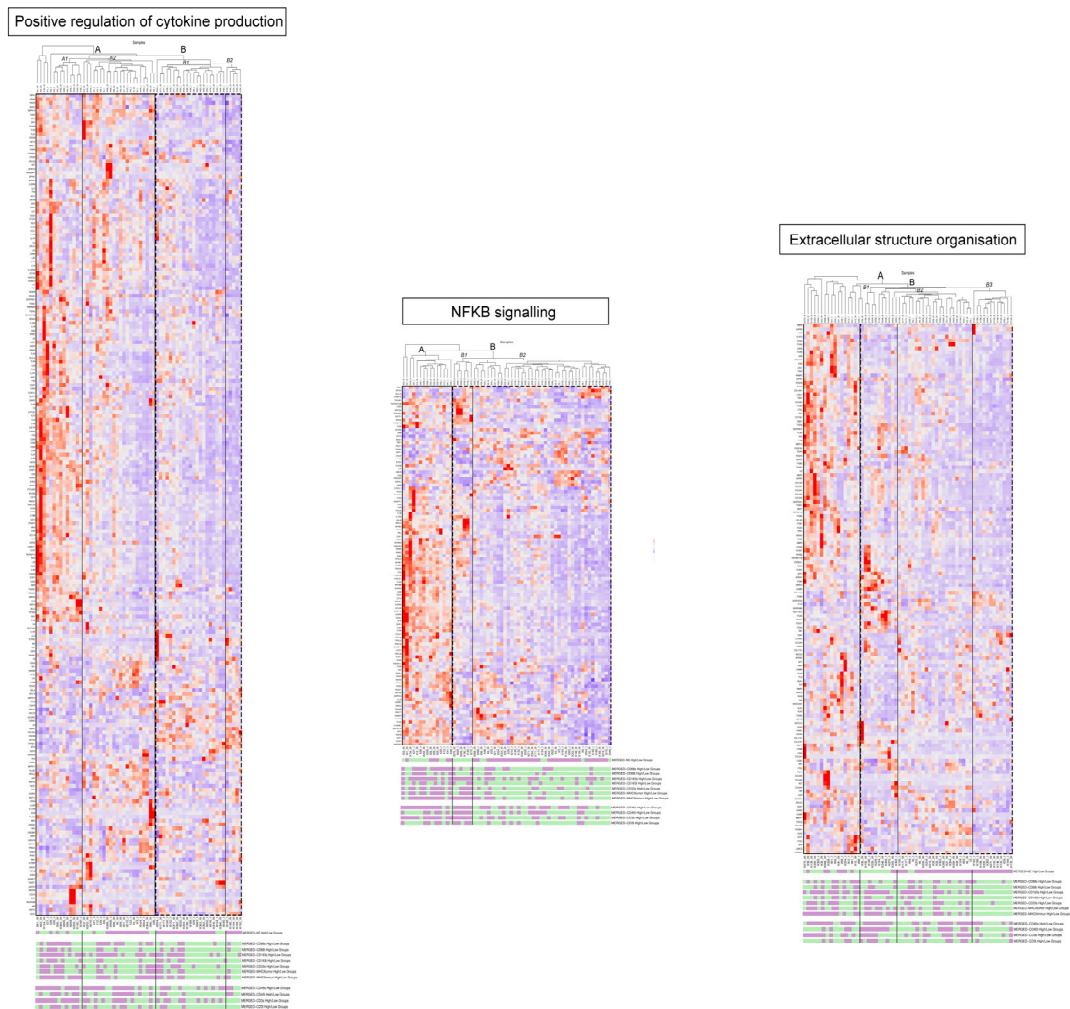

**Figure S5. Gene expression data of pathways on cytokine production, signaling, and extracellular structure organization**

Heatmaps show gene expression profile of GO pathways, *positive regulation of cytokine production*, *NFKB signaling* and *extracellular structure organization* at the level of individual tumor samples (primary and LN merged). The first two clusters (A1 and A2, A and B1 in *extracellular structure organization*) represent in majority NE-low tumors variable or high levels of macrophage- and T-cell infiltration. These tumors show strong overall expression in most genes of their corresponding pathway. The last clusters (B1 and B2 in *positive regulation of cytokine production*, B in *NFKB signaling*, and B2 and B3 in *extracellular structure organization*) comprises tumors of mainly NE-high phenotype, where they are associated with variable or low macrophage- and lymphocyte-densities.

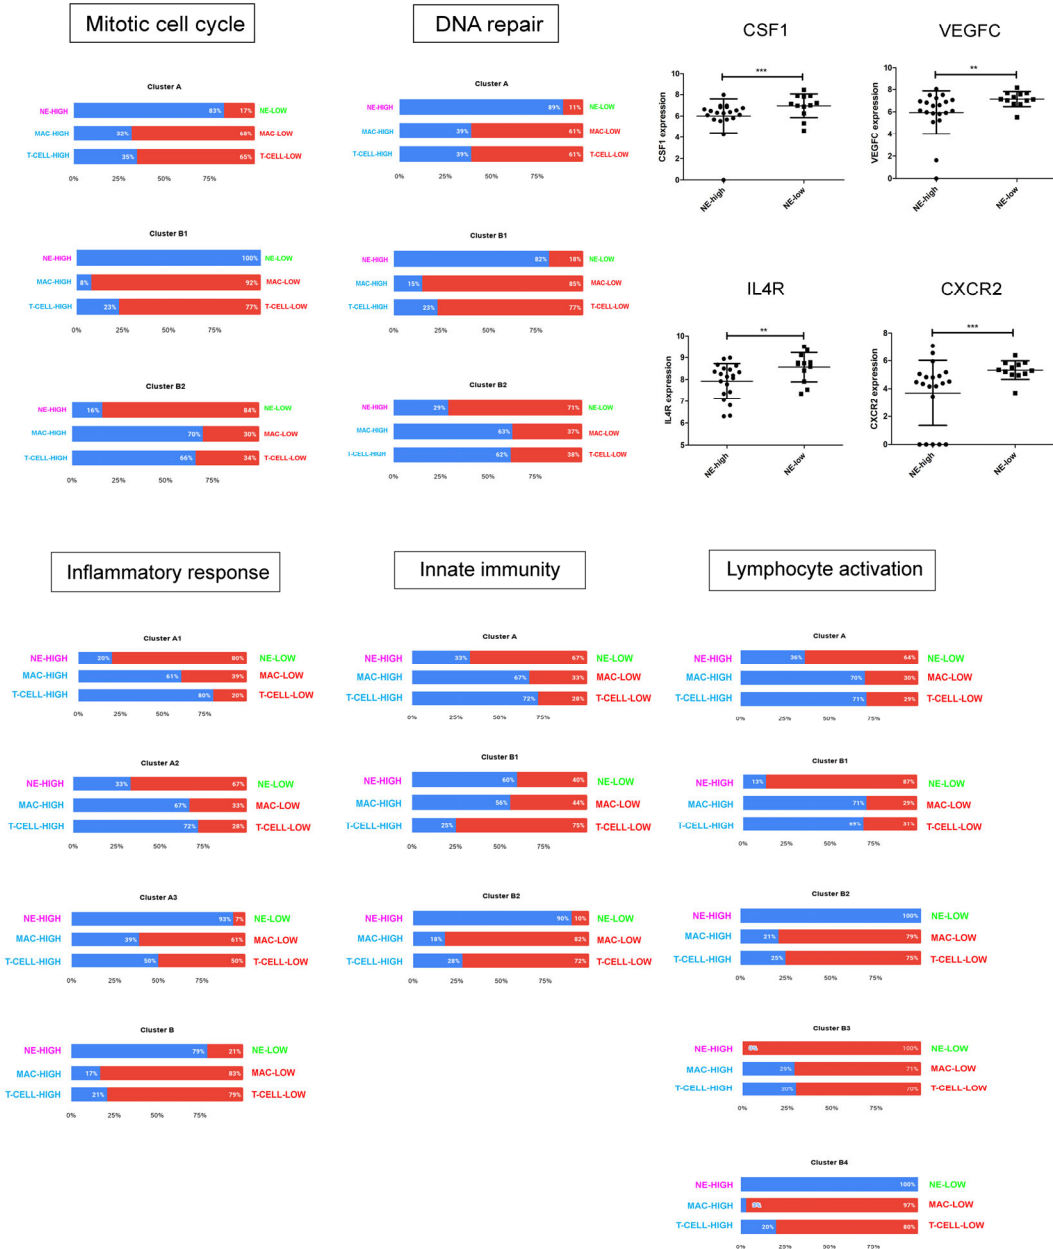

**Figure S6. Composition of patient tumor clusters according to NE-phenotype, macrophage- and T-cell infiltration.** Stacked bar charts show tumor-phenotype composition of different clusters according to oncogenic (*mitotic cell cycle*, *DNA-repair*), and immunogenic (*inflammatory response*, *innate immunity*, *lymphocyte activation*) GO pathways. Scatter plots show the differential expression of CSF1, VEGFC, IL4R and CXCR2 in NE-low compared to NE-high tumors.



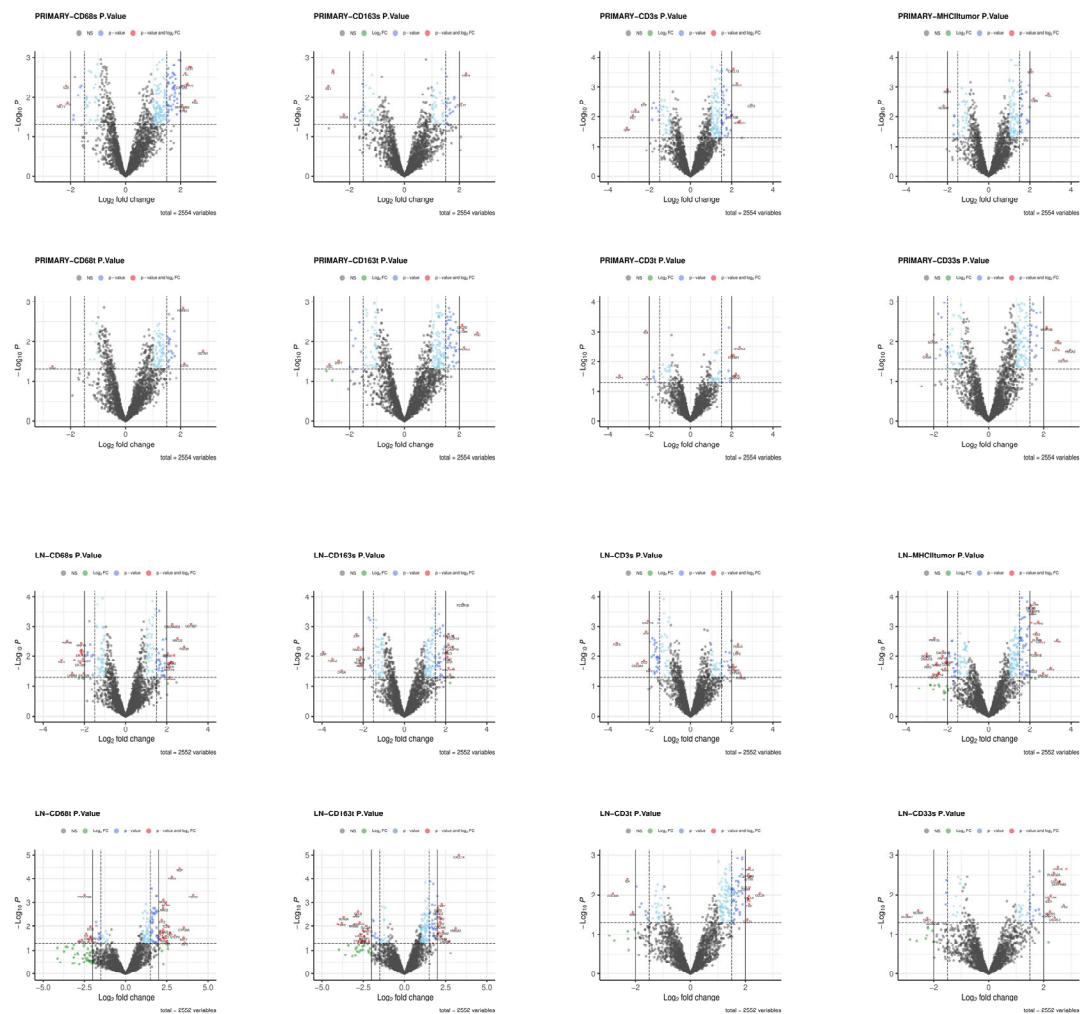

Figure S7. Volcano plots for parameters of selected IHC biomarkers in different tumor compartments



|                    |         |
|--------------------|---------|
| Immun oasis tumors |         |
| NE-low             | 6-I     |
| NE-low             | 21-I    |
| NE-low             | 39-I    |
| NE-low             | 270-I   |
| NE-low             | 209-I   |
| NE-low             | 190-I   |
| NE-low             | 134-I   |
| NE-low             | 12-III  |
| NE-low             | 270-III |
| NE-low             | 209-III |
| NE-low             | 190-III |
| NE-low             | 33-III  |
| NE-low             | 36-III  |
| NE-low             | 134-III |
| NE-high            | 28-I    |
| NE-high            | 33-I    |
| NE-high            | 352-I   |
| NE-high            | 3-I     |
| NE-high            | 41-I    |
| NE-high            | 171-III |
| NE-high            | 26-III  |
| NE-high            | 28-III  |
| NE-high            | 6-III   |
| NE-high            | 29-III  |
| NE-high            | 39-III  |
| NE-low             | NE-high |
| 14                 | 11      |

|                     |         |
|---------------------|---------|
| Immun desert tumors |         |
| NE-low              | 12-I    |
| NE-low              | 346-I   |
| NE-low              | 36-I    |
| NE-low              | 346-III |
| NE-high             | 104-I   |
| NE-high             | 126-I   |
| NE-high             | 132-I   |
| NE-high             | 148-I   |
| NE-high             | 171-I   |
| NE-high             | 188-I   |
| NE-high             | 204-I   |
| NE-high             | 210-I   |
| NE-high             | 216-I   |
| NE-high             | 268-I   |
| NE-high             | 271-I   |
| NE-high             | 29-I    |
| NE-high             | 354-I   |
| NE-high             | 363-I   |
| NE-high             | 104-III |
| NE-high             | 126-III |
| NE-high             | 132-III |
| NE-high             | 148-III |
| NE-high             | 188-III |
| NE-high             | 204-III |
| NE-high             | 210-III |
| NE-high             | 216-III |
| NE-high             | 268-III |
| NE-high             | 21-III  |
| NE-high             | 271-III |
| NE-high             | 352-III |
| NE-high             | 354-III |
| NE-high             | 363-III |
| NE-low              | NE-high |
| 4                   | 28      |

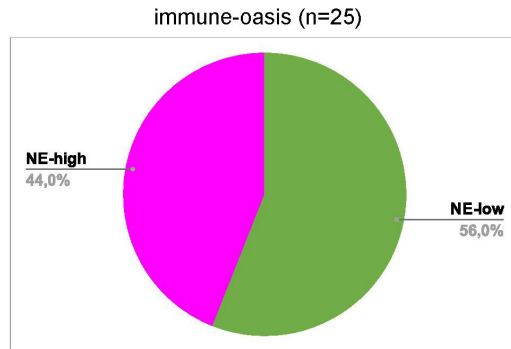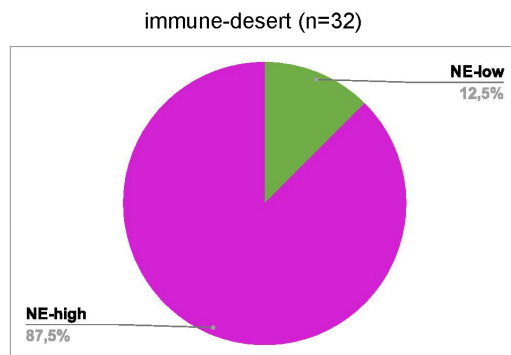

Figure S9. Immune-oasis and immune-desert tumors and their NE-phenotype



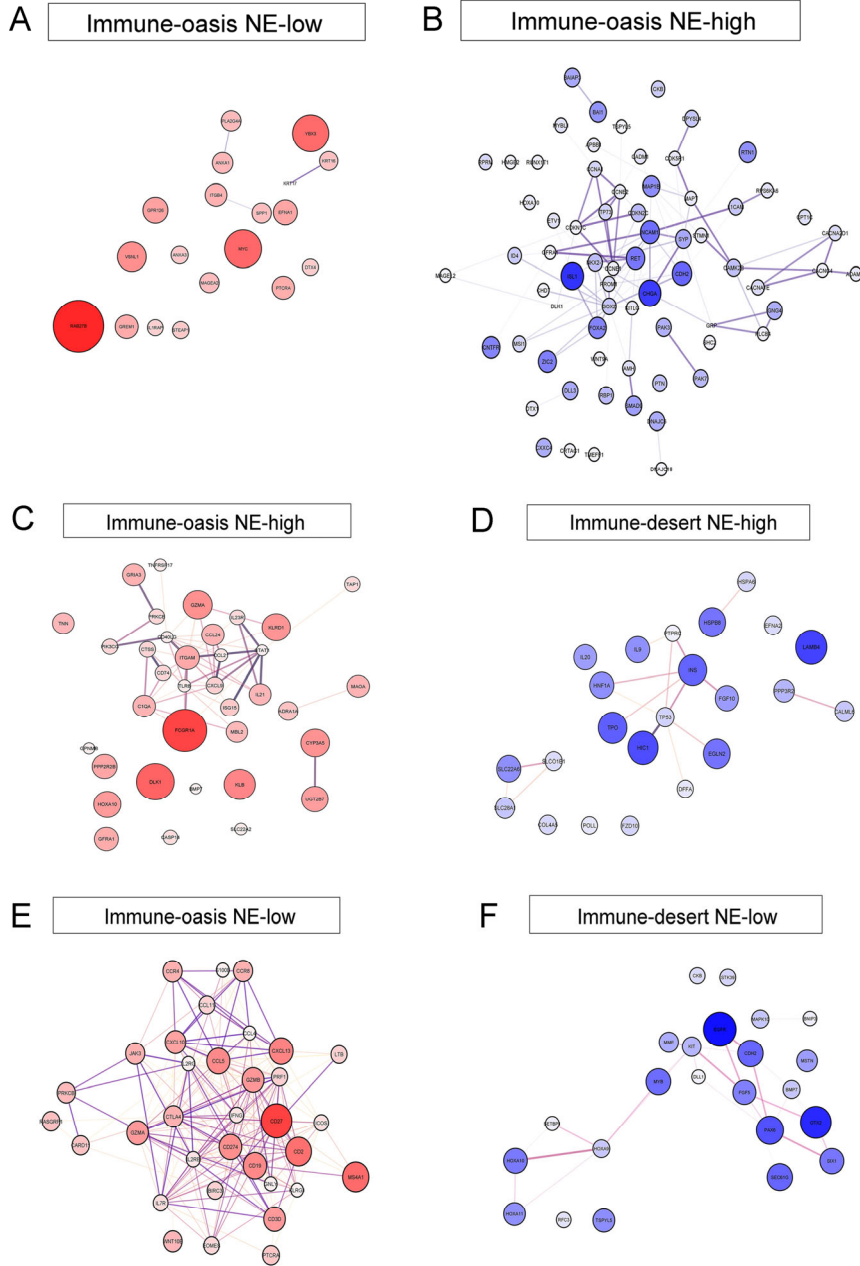

**Figure S10. Additional string maps for the comparison of SCLC tumor phenotypes**

In immune oasis NE-low tumors (vs immune oasis NE-high), the low number of differentially expressed genes show minimal interconnectedness, whereas central genes of immune oasis NE-high (vs immune oasis NE-low) tumors are interconnected moderately (A-B). Immune oasis NE-high tumors (vs immune desert NE-high) show a moderate level of interconnectedness, with an average of 1.54 edges/node and a total 36.72 connection score. Immune desert NE-high tumors (vs immune oasis NE-high) however represent weak interconnectedness with average 0.69 edges/node and 9.52 total connection score (C-D). Immune oasis NE-low (vs immune desert NE-low) tumors display strong interconnectedness among their differentially expressed genes with average 6 edges/node and 145.03 total connection score. In contrast, top genes of immune desert NE-low (vs immune oasis NE-low) tumors are interconnected weakly with average 1.42 edges/node and 19.51 total connection score (E-F).

**Table S1. Correlation between the tissue expression of different macrophage markers (CD68, CD163, and CD33), MHCII expression on tumor cells, CD45 immune cell marker and CD3 T-lymphocyte marker in stroma and tumor nests.**

| MACROPHAGE MARKERS |                    |                    |                    |                    |                    |  |  |  |  |
|--------------------|--------------------|--------------------|--------------------|--------------------|--------------------|--|--|--|--|
| PRIMARY            | CD68s              |                    |                    |                    |                    |  |  |  |  |
| CD68t              | r=0.945<br>p<0.001 | CD68t              |                    |                    |                    |  |  |  |  |
| CD163s             | r=0.455<br>p=0.02  | r=0.653<br>p=0.001 | CD163s             |                    |                    |  |  |  |  |
| CD163t             | r=0.628<br>p=0.01  | r=0.764<br>p=0.001 | r=0.594<br>p=0.003 | CD163t             |                    |  |  |  |  |
| CD33s              | r=0.405<br>p=0.034 | r=0.500<br>p=0.018 | r=0.651<br>p=0.001 | r=0.605<br>p=0.003 | CD33s              |  |  |  |  |
| MHCII tumor        | r=0.570<br>p=0.006 | r=0.703<br>p=0.001 | r=0.511<br>p=0.018 | r=0.801<br>p<0.001 | r=0.505<br>p=0.019 |  |  |  |  |

  

| LN          | CD68s              |                    |                    |                    |                    |  |  |  |  |
|-------------|--------------------|--------------------|--------------------|--------------------|--------------------|--|--|--|--|
| CD68t       | r=0.694<br>p<0.001 | CD68t              |                    |                    |                    |  |  |  |  |
| CD163s      | r=0.651<br>p<0.001 | r=0.478<br>p=0.016 | CD163s             |                    |                    |  |  |  |  |
| CD163t      | r=0.488<br>p=0.013 | r=0.410<br>p=0.042 | r=0.792<br>p<0.001 | CD163t             |                    |  |  |  |  |
| CD33s       | r=0.302<br>p=0.181 | r=0.270<br>p=0.224 | r=0.368<br>p=0.084 | r=0.382<br>p=0.097 | CD33s              |  |  |  |  |
| MHCII tumor | r=0.529<br>p=0.011 | r=0.314<br>p=0.155 | r=0.757<br>p<0.001 | r=0.720<br>p<0.001 | r=0.499<br>p=0.021 |  |  |  |  |

  

| MACROPHAGE- CD45 - CD3 |                    |                    |                    |                    |  |  |  |  |  |
|------------------------|--------------------|--------------------|--------------------|--------------------|--|--|--|--|--|
| PRIMARY                | CD45s              | CD45t              | CD3s               | CD3t               |  |  |  |  |  |
| CD68s                  | r=0.575<br>p=0.002 | r=0.581<br>p=0.004 | r=0.515<br>p=0.007 | r=0.502<br>p=0.011 |  |  |  |  |  |
| CD68t                  | r=0.735<br>p<0.001 | r=0.807<br>p<0.001 | r=0.735<br>p<0.001 | r=0.812<br>p<0.001 |  |  |  |  |  |
| CD163s                 | r=0.811<br>p<0.001 | r=0.791<br>p<0.001 | r=0.864<br>p<0.001 | r=0.783<br>p<0.001 |  |  |  |  |  |
| CD163t                 | r=0.749<br>p<0.001 | r=0.759<br>p<0.001 | r=0.743<br>p<0.001 | r=0.707<br>p<0.001 |  |  |  |  |  |
| CD33s                  | r=0.601<br>p=0.002 | r=0.602<br>p=0.002 | r=0.629<br>p=0.001 | r=0.631<br>p=0.001 |  |  |  |  |  |
| MHCII tumor            | r=0.661<br>p<0.001 | r=0.753<br>p<0.001 | r=0.626<br>p=0.001 | r=0.705<br>p=0.001 |  |  |  |  |  |

  

| LN          | CD45s              | CD45t              | CD3s               | CD3t               |  |  |  |  |  |
|-------------|--------------------|--------------------|--------------------|--------------------|--|--|--|--|--|
| CD68s       | r=0.410<br>p=0.047 | r=0.584<br>p=0.008 | r=0.448<br>p=0.028 | r=0.633<br>p=0.002 |  |  |  |  |  |
| CD68t       | r=0.374<br>p=0.079 | r=0.452<br>p=0.035 | r=0.350<br>p=0.102 | r=0.478<br>p=0.025 |  |  |  |  |  |
| CD163s      | r=0.447<br>p=0.028 | r=0.729<br>p<0.001 | r=0.349<br>p=0.095 | r=0.676<br>p=0.001 |  |  |  |  |  |
| CD163t      | r=0.359<br>p=0.092 | r=0.738<br>p<0.001 | r=0.210<br>p=0.335 | r=0.573<br>p=0.005 |  |  |  |  |  |
| CD33s       | r=0.705<br>p<0.001 | r=0.638<br>p=0.002 | r=0.680<br>p=0.001 | r=0.627<br>p=0.003 |  |  |  |  |  |
| MHCII tumor | r=0.422<br>p=0.050 | r=0.654<br>p<0.001 | r=0.416<br>p=0.054 | r=0.605<br>p=0.004 |  |  |  |  |  |

  

|                                                              |                                                                |
|--------------------------------------------------------------|----------------------------------------------------------------|
| very strong, significant correlation<br>r > 0.8<br>p < 0.001 | moderate, significant correlation<br>0.4 < r > 0.6<br>p < 0.05 |
| strong, significant correlation<br>r > 0.6<br>p < 0.01       | weak, insignificant correlation<br>r < 0.4<br>p > 0.05         |

**Table S2. Cut-off values for macrophage related IHC biomarkers (HIGH- and LOW tumor categories)**  
Percentages represent the ratios of HIGH- and LOW tumors from the whole patient cohort.

|                                                  | CD68s       | CD68t       | CD163s      | CD163t      | MHCII<br>immune                       | MHCII<br>tumor                        | CD33s                                 | NE          |
|--------------------------------------------------|-------------|-------------|-------------|-------------|---------------------------------------|---------------------------------------|---------------------------------------|-------------|
| <b>PRIMARY</b>                                   |             |             |             |             |                                       |                                       |                                       |             |
| HIGH                                             | 13/29 (45%) | 10/29 (34%) | 20/29 (69%) | 8/29 (28%)  | 15/29 (52%)                           | 10/29 (34%)                           | 12/29 (41%)                           | 19/29 (66%) |
| LOW                                              | 16/29 (55%) | 19/29 (66%) | 9/29 (31%)  | 21/29 (72%) | 14/29 (48%)                           | 19/29 (66%)                           | 17/29 (59%)                           | 10/29 (34%) |
| cut-off<br>(cell/mm <sup>2</sup><br>score (0-3)) | 291.23      | 39.68       | 413.33      | 63.65       | 0-1 --><br>LOW --><br>2-3 --><br>HIGH | 0-1 --><br>LOW --><br>2-3 --><br>HIGH | 0-1 --><br>LOW --><br>2-3 --><br>HIGH |             |
| <b>LN</b>                                        |             |             |             |             |                                       |                                       |                                       |             |
| HIGH                                             | 10/29 (34%) | 5/29 (17%)  | 13/29 (45%) | 7/29 (24%)  | 16/29 (55%)                           | 10/29 (34%)                           | 10/29 (34%)                           | 22/29 (76%) |
| LOW                                              | 19/29 (66%) | 24/29 (83%) | 16/29 (55%) | 22/29 (76%) | 13/29 (45%)                           | 19/29 (66%)                           | 19/29 (66%)                           | 7/29 (24%)  |
| cut-off<br>(cell/mm <sup>2</sup><br>score (0-3)) | 631.25      | 115.48      | 246.94      | 27.82       | 0-1 --><br>LOW --><br>2-3 --><br>HIGH | 0-1 --><br>LOW --><br>2-3 --><br>HIGH | 0-1 --><br>LOW --><br>2-3 --><br>HIGH |             |

**Table S3. Cut-off values for IHC biomarkers CD45 and CD3 (HIGH- and LOW tumor categories)**

Percentages represent the ratios of HIGH- and LOW tumors from the whole patient cohort.

|                                                | CD45s       | CD45t       | CD3s        | CD3t        |
|------------------------------------------------|-------------|-------------|-------------|-------------|
| <b>PRIMARY</b>                                 |             |             |             |             |
| HIGH                                           | 15/28 (54%) | 13/28 (46%) | 11/28 (39%) | 11/28 (39%) |
| LOW                                            | 13/28 (46%) | 15/28 (54%) | 17/28 (61%) | 17/28 (61%) |
| cut-off (cell/mm <sup>2</sup> )<br>score (0-3) | 568.93      | 45.51       | 201.55      | 15.96       |
| <b>LN</b>                                      |             |             |             |             |
| HIGH                                           | 20/28 (69%) | 8/29 (28%)  | 18/29 (62%) | 5/29 (17%)  |
| LOW                                            | 9/29 (31%)  | 21/29 (72%) | 11/29 (38%) | 24/29 (83%) |
| cut-off (cell/mm <sup>2</sup> )<br>score (0-3) | 848.98      | 86.08       | 298.48      | 43.24       |

Table S4. HIGH and LOW annotation for NE-high and NE-low tumors according to protein marker expression

|         | CD68  |       | CD163  |        | MHCII        |             |       | CD45  |       | CD3  |      |
|---------|-------|-------|--------|--------|--------------|-------------|-------|-------|-------|------|------|
| PRIMARY | CD68s | CD68t | CD163s | CD163t | MHCII immune | MHCII tumor | CD33s | CD45s | CD45t | CD3s | CD3t |
| 12-I    | HIGH  | LOW   | LOW    | LOW    | LOW          | LOW         | LOW   | HIGH  | LOW   | LOW  | LOW  |
| 6-I     | HIGH  | HIGH  | HIGH   | HIGH   | HIGH         | HIGH        | LOW   | HIGH  | HIGH  | HIGH | HIGH |
| 21-I    | HIGH  | HIGH  | HIGH   | HIGH   | HIGH         | HIGH        | HIGH  | HIGH  | LOW   | HIGH | LOW  |
| 26-I    | HIGH  | HIGH  | HIGH   | HIGH   | HIGH         | HIGH        | HIGH  | HIGH  | NA    | NA   | NA   |
| 36-I    | NA    | NA    | NA     | NA     | NA           | NA          | NA    | NA    | NA    | NA   | NA   |
| 39-I    | HIGH  | HIGH  | HIGH   | HIGH   | HIGH         | HIGH        | NA    | HIGH  | HIGH  | HIGH | HIGH |
| 355-I   | LOW   | LOW   | HIGH   | LOW    | HIGH         | LOW         | LOW   | LOW   | LOW   | LOW  | LOW  |
| 346-I   | LOW   | LOW   | HIGH   | LOW    | LOW          | LOW         | HIGH  | LOW   | LOW   | LOW  | LOW  |
| 270-I   | LOW   | LOW   | HIGH   | HIGH   | HIGH         | HIGH        | LOW   | HIGH  | HIGH  | HIGH | HIGH |
| 209-I   | HIGH  | LOW   | HIGH   | LOW    | HIGH         | HIGH        | HIGH  | HIGH  | HIGH  | HIGH | HIGH |
| 190-I   | HIGH  | HIGH  | HIGH   | HIGH   | HIGH         | HIGH        | HIGH  | HIGH  | HIGH  | HIGH | HIGH |
| 134-I   | LOW   | HIGH  | HIGH   | LOW    | HIGH         | LOW         | HIGH  | LOW   | HIGH  | HIGH | HIGH |
| 104-I   | LOW   | LOW   | LOW    | LOW    | LOW          | LOW         | LOW   | LOW   | LOW   | LOW  | LOW  |
| 126-I   | LOW   | LOW   | LOW    | LOW    | LOW          | LOW         | LOW   | LOW   | LOW   | LOW  | LOW  |
| 132-I   | LOW   | LOW   | HIGH   | LOW    | LOW          | LOW         | LOW   | HIGH  | HIGH  | LOW  | HIGH |
| 148-I   | LOW   | LOW   | LOW    | LOW    | LOW          | LOW         | LOW   | LOW   | LOW   | LOW  | LOW  |
| 171-I   | LOW   | LOW   | HIGH   | LOW    | NA           | NA          | HIGH  | HIGH  | HIGH  | HIGH | LOW  |
| 188-I   | LOW   | LOW   | HIGH   | LOW    | LOW          | LOW         | NA    | LOW   | LOW   | LOW  | LOW  |
| 204-I   | LOW   | LOW   | HIGH   | LOW    | NA           | NA          | NA    | HIGH  | HIGH  | LOW  | HIGH |
| 210-I   | LOW   | LOW   | HIGH   | LOW    | NA           | NA          | NA    | HIGH  | HIGH  | LOW  | HIGH |
| 216-I   | LOW   | LOW   | LOW    | LOW    | LOW          | LOW         | LOW   | LOW   | LOW   | LOW  | LOW  |
| 268-I   | LOW   | LOW   | HIGH   | LOW    | HIGH         | LOW         | HIGH  | LOW   | LOW   | LOW  | LOW  |
| 271-I   | LOW   | LOW   | LOW    | LOW    | HIGH         | LOW         | LOW   | LOW   | LOW   | LOW  | LOW  |
| 28-I    | HIGH  | HIGH  | HIGH   | HIGH   | HIGH         | LOW         | LOW   | HIGH  | HIGH  | HIGH | HIGH |
| 29-I    | HIGH  | LOW   | LOW    | LOW    | NA           | NA          | LOW   | LOW   | LOW   | LOW  | LOW  |
| 332-I   | LOW   | LOW   | HIGH   | HIGH   | HIGH         | HIGH        | LOW   | HIGH  | LOW   | LOW  | LOW  |
| 33-I    | HIGH  | HIGH  | HIGH   | LOW    | HIGH         | HIGH        | HIGH  | HIGH  | HIGH  | HIGH | HIGH |
| 352-I   | HIGH  | HIGH  | LOW    | LOW    | HIGH         | HIGH        | LOW   | HIGH  | HIGH  | LOW  | LOW  |
| 354-I   | LOW   | LOW   | LOW    | LOW    | LOW          | LOW         | LOW   | LOW   | LOW   | LOW  | LOW  |
| 363-I   | LOW   | LOW   | HIGH   | LOW    | HIGH         | LOW         | HIGH  | HIGH  | LOW   | HIGH | LOW  |
| 3-I     | HIGH  | LOW   | HIGH   | LOW    | NA           | NA          | LOW   | LOW   | LOW   | LOW  | LOW  |
| 43-I    | LOW   | LOW   | HIGH   | LOW    | HIGH         | LOW         | HIGH  | LOW   | LOW   | LOW  | LOW  |
| LN      |       |       |        |        |              |             |       |       |       |      |      |
| 12-III  | HIGH  | HIGH  | HIGH   | LOW    | HIGH         | LOW         | LOW   | HIGH  | LOW   | HIGH | LOW  |
| 33-III  | LOW   | LOW   | LOW    | LOW    | NA           | NA          | NA    | HIGH  | HIGH  | HIGH | HIGH |
| 36-III  | LOW   | LOW   | LOW    | LOW    | LOW          | LOW         | LOW   | HIGH  | LOW   | HIGH | LOW  |
| 355-III | HIGH  | HIGH  | HIGH   | HIGH   | HIGH         | HIGH        | HIGH  | HIGH  | HIGH  | HIGH | HIGH |
| 346-III | LOW   | LOW   | LOW    | LOW    | HIGH         | LOW         | LOW   | LOW   | LOW   | LOW  | LOW  |
| 270-III | LOW   | LOW   | HIGH   | HIGH   | HIGH         | LOW         | LOW   | LOW   | LOW   | HIGH | LOW  |
| 209-III | LOW   | LOW   | HIGH   | LOW    | HIGH         | HIGH        | HIGH  | HIGH  | HIGH  | HIGH | LOW  |
| 190-III | LOW   | LOW   | HIGH   | HIGH   | HIGH         | HIGH        | HIGH  | HIGH  | HIGH  | HIGH | HIGH |
| 134-III | LOW   | LOW   | HIGH   | LOW    | NA           | NA          | HIGH  | HIGH  | LOW   | HIGH | LOW  |
| 104-III | LOW   | LOW   | LOW    | LOW    | LOW          | LOW         | HIGH  | HIGH  | LOW   | HIGH | LOW  |
| 126-III | LOW   | LOW   | LOW    | LOW    | NA           | NA          | NA    | LOW   | LOW   | LOW  | LOW  |
| 132-III | LOW   | LOW   | LOW    | LOW    | LOW          | LOW         | LOW   | HIGH  | LOW   | HIGH | LOW  |
| 148-III | LOW   | LOW   | LOW    | LOW    | LOW          | LOW         | LOW   | LOW   | LOW   | LOW  | LOW  |
| 171-III | LOW   | LOW   | HIGH   | HIGH   | HIGH         | HIGH        | LOW   | HIGH  | HIGH  | LOW  | LOW  |
| 188-III | LOW   | LOW   | LOW    | LOW    | LOW          | LOW         | LOW   | HIGH  | LOW   | HIGH | LOW  |
| 204-III | LOW   | LOW   | LOW    | LOW    | NA           | NA          | LOW   | LOW   | LOW   | LOW  | LOW  |
| 210-III | LOW   | LOW   | LOW    | LOW    | LOW          | LOW         | LOW   | LOW   | LOW   | LOW  | LOW  |
| 216-III | LOW   | LOW   | LOW    | LOW    | LOW          | LOW         | LOW   | LOW   | LOW   | LOW  | LOW  |
| 21-III  | HIGH  | LOW   | HIGH   | LOW    | HIGH         | LOW         | LOW   | LOW   | LOW   | HIGH | LOW  |
| 268-III | LOW   | LOW   | LOW    | LOW    | HIGH         | LOW         | NA    | LOW   | LOW   | LOW  | LOW  |
| 26-III  | HIGH  | LOW   | HIGH   | LOW    | HIGH         | HIGH        | NA    | HIGH  | HIGH  | HIGH | HIGH |
| 271-III | LOW   | LOW   | LOW    | LOW    | LOW          | LOW         | LOW   | LOW   | LOW   | LOW  | LOW  |
| 28-III  | HIGH  | HIGH  | HIGH   | HIGH   | HIGH         | NA          | NA    | HIGH  | HIGH  | HIGH | HIGH |
| 29-III  | HIGH  | LOW   | HIGH   | LOW    | HIGH         | LOW         | HIGH  | HIGH  | HIGH  | HIGH | HIGH |
| 332-III | LOW   | LOW   | LOW    | LOW    | LOW          | LOW         | LOW   | LOW   | LOW   | HIGH | LOW  |
| 352-III | LOW   | LOW   | LOW    | HIGH   | HIGH         | LOW         | LOW   | HIGH  | HIGH  | LOW  | LOW  |
| 354-III | LOW   | LOW   | LOW    | LOW    | LOW          | LOW         | LOW   | HIGH  | LOW   | HIGH | LOW  |
| 363-III | LOW   | LOW   | LOW    | LOW    | LOW          | LOW         | NA    | HIGH  | LOW   | LOW  | LOW  |
| 39-III  | HIGH  | LOW   | LOW    | LOW    | HIGH         | NA          | HIGH  | HIGH  | LOW   | HIGH | LOW  |
| 3-III   | HIGH  | LOW   | LOW    | LOW    | LOW          | LOW         | LOW   | HIGH  | LOW   | HIGH | LOW  |
| 43-III  | LOW   | LOW   | LOW    | LOW    | LOW          | LOW         | LOW   | HIGH  | LOW   | HIGH | LOW  |
| 6-III   | HIGH  | HIGH  | HIGH   | HIGH   | HIGH         | HIGH        | LOW   | HIGH  | LOW   | LOW  | LOW  |

**Table S5. Node and edge data for string maps**

|                                                                                       |    |                                                                                        |
|---------------------------------------------------------------------------------------|----|----------------------------------------------------------------------------------------|
| <b>NE-low</b><br>Nodes<br>Edges<br>edges/node<br>total edge score (SUM)               | VS | <b>NE-high</b><br>Nodes<br>Edges<br>edges/node<br>total edge score (SUM)               |
| 68<br>148<br>2.18<br>94.147                                                           |    | 65<br>77<br>1.18<br>51.35                                                              |
| <b>Immune-oasis</b><br>Nodes<br>Edges<br>edges/node<br>total edge score (SUM)         | VS | <b>Immune-desert</b><br>Nodes<br>Edges<br>edges/node<br>total edge score (SUM)         |
| 27<br>53<br>1.963<br>36.98                                                            |    | 20<br>21<br>1.05<br>13.51                                                              |
| <b>Immune-oasis NE-high</b><br>Nodes<br>Edges<br>edges/node<br>total edge score (SUM) | VS | <b>Immune-oasis NE-low</b><br>Nodes<br>Edges<br>edges/node<br>total edge score (SUM)   |
| 32<br>17<br>0.531<br>11.39                                                            |    | 90<br>133<br>1.48<br>90.58                                                             |
| <b>Immune-oasis NE-low</b><br>Nodes<br>Edges<br>edges/node<br>total edge score (SUM)  | VS | <b>Immune-desert NE-high</b><br>Nodes<br>Edges<br>edges/node<br>total edge score (SUM) |
| 37<br>57<br>1.54<br>36.72                                                             |    | 23<br>16<br>0.69<br>9.52                                                               |
| <b>Immune-oasis NE-low</b><br>Nodes<br>Edges<br>edges/node<br>total edge score (SUM)  | VS | <b>Immune-desert NE-low</b><br>Nodes<br>Edges<br>edges/node<br>total edge score (SUM)  |
| 36<br>216<br>6<br>145.032                                                             |    | 24<br>34<br>1.42<br>19.51                                                              |

**Supplemental Table 6. Possible therapeutic interventions on eligible molecular targets.**

List of NE-low and NE-high molecular targets against which drugs are already available or under development. *N.A.*:

*no available drug*

*PDF with links as attachment*
