# Supplementary material for: Characterization of Tumor-Associated Macrophages and the Immune Microenvironment in Limited-Stage Neuroendocrine-High and -Low Small Cell Lung Cancer
Source: MDPI journal article supplement (doi:10.3390/biology10060502), 2021-06-04
Supplement: s1 [file s1]

| Target         | Subcellular localisation     | Molecular function                                                                                                                                                        | Drug name<br>DrugBank ID                | Mechanism<br>Study status                                                      | Drug name<br>DrugBank ID             | Mechanism<br>Study status                                                      |
|----------------|------------------------------|---------------------------------------------------------------------------------------------------------------------------------------------------------------------------|-----------------------------------------|--------------------------------------------------------------------------------|--------------------------------------|--------------------------------------------------------------------------------|
| <b>MMP7</b>    | extracellular                | Degrades casein, gelatins of types I, III, IV, and V, and fibronectin.<br>Activates procollagenase                                                                        | marimastat<br><a href="#">DB00786</a>   | MMP-inhibitor<br><br>Phase 3<br><a href="#">ClinicalTrials</a>                 | N.A                                  | N.A                                                                            |
| <b>CXCR2</b>   | plasmamembrane               | Receptor for interleukin-8 which is a powerful neutrophil chemotactic factor                                                                                              | reparixin<br><a href="#">DB12614</a>    | chemokine receptor antagonist<br><br>Phase 3<br><a href="#">ClinicalTrials</a> | danirixin<br><a href="#">DB11922</a> | chemokine receptor antagonist<br><br>Phase 2<br><a href="#">ClinicalTrials</a> |
| <b>CES1</b>    | cytoplasm                    | Involved in the detoxification of xenobiotics and in the activation of ester and amide prodrugs                                                                           | apoptosis- activator-II                 | CES- inhibitor<br><br>preclinical                                              | avasimibe<br><a href="#">DB06442</a> | ACAT inhibitor<br><br>Phase3<br><a href="#">PubMed</a>                         |
| <b>ITGB6</b>   | plasmamembrane               | Integrin alpha-V:beta-6) is a receptor for fibronectin and cytactin                                                                                                       | integrin-antagonist-1                   | integrin antagonist<br><br>Phase 1<br><a href="#">ClinicalTrials</a>           | N.A                                  | N.A                                                                            |
| <b>BIRC3</b>   | nucleus                      | Multi-functional protein which regulates caspases, apoptosis, inflammatory signaling and immunity, mitogenic kinase signaling and cell proliferation.                     | birinapant<br><a href="#">DB11782</a>   | XIAP inhibitor<br><br>Phase 2<br><a href="#">ClinicalTrials</a>                | AT-406                               | IAP antagonist<br><br>Phase 1<br><a href="#">ClinicalTrials</a>                |
| <b>BCAT1</b>   | cytoplasm, mitochondrion     | Catalyzes the first reaction in the catabolism of the essential branched chain amino acids leucine, isoleucine, and valine.                                               | L- glutamate<br><a href="#">DB00142</a> | glutamate receptor agonist<br><br>Launched                                     | N.A                                  | N.A                                                                            |
| <b>ALDH2</b>   | Mito-chondrion               | This protein is involved the subpathway that synthesizes acetate from ethanol                                                                                             | disulfiram<br><a href="#">DB00822</a>   | ALDH-inhibitor<br><br>launched                                                 | daidzin<br><a href="#">DB02115</a>   | glycosyloxyisoflavone<br><br>Phase 1<br><a href="#">ClinicalTrials</a>         |
| <b>TNFSF10</b> | plasmamebrane, extracellular | Cytokine that induces apoptosis. Its activity may be modulated by binding to the decoy receptors TNFRSF10C/TRAILR3                                                        | ONC201<br><a href="#">DB14844</a>       | AKT-inhibitor<br><br>Phase 2<br><a href="#">ClinicalTrials</a>                 | N.A                                  | N.A                                                                            |
| <b>MYC</b>     | nucleus                      | Transcription factor that binds DNA in a non-specific manner. Activates the transcription of growth-related genes, promoting VEGFA production and subsequent angiogenesis | AZD5153                                 | bromodomain inhibitor<br><br>Phase1<br><a href="#">ClinicalTrials</a>          | mivebresib                           | bromodomain inhibitor<br><br>Phase 1<br><a href="#">ClinicalTrials</a>         |

|              |                               |                                                                                                                                                                                  |                                        |                                                                                                        |                                             |                                                                                                        |
|--------------|-------------------------------|----------------------------------------------------------------------------------------------------------------------------------------------------------------------------------|----------------------------------------|--------------------------------------------------------------------------------------------------------|---------------------------------------------|--------------------------------------------------------------------------------------------------------|
| <b>CDH2</b>  | plasmamembrane                | Calcium-dependent cell adhesion protein. Acts as a regulator of neural stem cells quiescence by mediating anchorage of neural stem cells                                         | exherin                                | cadherin antagonist<br>Phase 2<br><a href="#">ClinicalTrials</a>                                       | N.A                                         | N.A                                                                                                    |
| <b>EGLN2</b> | nucleus                       | Cellular oxygen sensor that catalyzes, under normoxic conditions, the post-translational formation of 4-hydroxyproline in hypoxia-inducible factor (HIF) alpha proteins          | FG-2216<br><a href="#">DB08687</a>     | hypoxia inducible factor prolyl hydroxylase inhibitor<br><br>Phase 2<br><a href="#">ClinicalTrials</a> | vadadustat<br><a href="#">DB12255</a>       | hypoxia inducible factor prolyl hydroxylase inhibitor<br><br>Phase 3<br><a href="#">ClinicalTrials</a> |
| <b>PAK7</b>  | nucleus, mitochondrion        | Serine/threonine protein kinase that plays a role in a variety of different signaling pathways including cytoskeleton regulation, cell migration, proliferation or cell survival | GSK690693<br><a href="#">DB12745</a>   | AKT inhibitor<br><br>Phase 1<br><a href="#">ClinicalTrials</a>                                         | N.A                                         | N.A                                                                                                    |
| <b>TPO</b>   | plasma-mebrane, extracellular | Iodination and coupling of the hormonogenic tyrosines in thyroglobulin to yield the thyroid hormones T <sub>3</sub> and T <sub>4</sub>                                           | carbimazole<br><a href="#">DB00389</a> | antithyroid agent<br><br>Launched                                                                      | propylthiouracil<br><a href="#">DB00550</a> | thyroid peroxidase inhibitor<br><br>Launched                                                           |
